# Supplementary material for: Multi-omics data integration towards sustainable bovine production, health and welfare: the case of painful foot lesions
Source: Research Square preprint supplement (doi:10.21203/rs.3.rs-6000979/v2), 2026-01-21
Supplement: Supplementary file 1 [file 93771f9f42d4d7eda6fba4fd.xlsx]

## Sheet: Description
Sheet	Description
S1	Foot tissue PLSDA loading scores after DIABLO analysis
S2	PBL PLSDA loading scoress after DIABLO analysis
S3	Foot tissue feature community membership after greedy clustering of network
S4	PBL features community membership fter greedy clustering of network

## Sheet: S1
Block	Feature	Loading
Genotype	BovChr5Pos38483708	-0.23
Genotype	BovChr3Pos88966274	-0.18
Genotype	BovChr3Pos92637901	-0.18
Genotype	BovChr3Pos87458490	-0.18
Genotype	BovChr3Pos91549234	-0.18
Genotype	BovChr14Pos80813248	-0.17
Genotype	BovChr10Pos49448554	-0.16
Genotype	BovChr1Pos152960777	-0.14
Genotype	BovChr1Pos45105866	-0.12
Genotype	BovChr18Pos33388109	-0.12
Genotype	BovChr14Pos78489957	-0.12
Genotype	BovChr17Pos46078006	-0.12
Genotype	BovChr10Pos61162083	-0.12
Genotype	BovChr10Pos65020001	-0.12
Genotype	BovChr5Pos71548472	-0.12
Genotype	BovChr3Pos92431268	-0.12
Genotype	BovChr5Pos87901217	-0.11
Genotype	BovChr23Pos43909068	-0.11
Genotype	BovChr5Pos41084896	-0.1
Genotype	BovChr3Pos34903364	-0.1
Genotype	BovChr1Pos147295445	-0.09
Genotype	BovChr1Pos59924376	-0.09
Genotype	BovChr10Pos65055281	-0.09
Genotype	BovChr19Pos41594056	-0.09
Genotype	BovChr10Pos61137869	-0.08
Genotype	BovChr1Pos49415050	-0.08
Genotype	BovChr10Pos61837266	-0.08
Genotype	BovChr1Pos140713996	-0.08
Genotype	BovChr14Pos78508738	-0.08
Genotype	BovChr14Pos78522424	-0.08
Genotype	BovChr21Pos23567453	-0.08
Genotype	BovChr21Pos23723788	-0.08
Genotype	BovChr5Pos88647267	-0.07
Genotype	BovChr27Pos35710124	-0.07
Genotype	BovChr15Pos5234380	-0.07
Genotype	BovChr18Pos58716448	-0.06
Genotype	BovChr3Pos89098449	-0.06
Genotype	BovChr17Pos58946521	-0.06
Genotype	BovChr17Pos49107623	-0.05
Genotype	BovChr10Pos62442084	-0.04
Genotype	BovChr8Pos37458257	-0.04
Genotype	BovChr5Pos87192767	-0.04
Genotype	BovChr10Pos81113154	-0.04
Genotype	BovChr10Pos81229490	-0.03
Genotype	BovChr1Pos147241898	-0.03
Genotype	BovChr8Pos36246265	-0.02
Genotype	BovChr18Pos57151314	-0.02
Genotype	BovChr18Pos32192982	-0.02
Genotype	BovChr15Pos7037828	-0.01
Genotype	BovChr5Pos87846351	-0.01
Genotype	BovChr18Pos32277796	-0.01
Genotype	BovChr1Pos147338727	-0.01
Genotype	BovChr1Pos146497300	-0.01
Genotype	BovChr28Pos27160954	-0.01
Genotype	BovChr3Pos30167683	0
Genotype	BovChr15Pos5127591	0
Genotype	BovChr27Pos38172660	0
Genotype	BovChr28Pos30633568	0.01
Genotype	BovChr28Pos26892434	0.02
Genotype	BovChr23Pos44070630	0.02
Genotype	BovChr15Pos9454207	0.02
Genotype	BovChr27Pos23369775	0.02
Genotype	BovChr5Pos89051206	0.03
Genotype	BovChr8Pos35438545	0.03
Genotype	BovChr28Pos42578721	0.03
Genotype	BovChr4Pos52315044	0.03
Genotype	BovChr10Pos81223782	0.04
Genotype	BovChr28Pos27400738	0.04
Genotype	BovChr8Pos87245919	0.04
Genotype	BovChr5Pos88079689	0.04
Genotype	BovChr4Pos87598662	0.04
Genotype	BovChr3Pos88821997	0.04
Genotype	BovChr17Pos46005257	0.04
Genotype	BovChr8Pos60881902	0.05
Genotype	BovChr25Pos1825647	0.05
Genotype	BovChr3Pos96202292	0.05
Genotype	BovChr1Pos141365527	0.06
Genotype	BovChr3Pos88991871	0.06
Genotype	BovChr18Pos61330975	0.07
Genotype	BovChr3Pos89181812	0.07
Genotype	BovChr28Pos27459868	0.07
Genotype	BovChr3Pos87056414	0.07
Genotype	BovChr18Pos57682137	0.08
Genotype	BovChr5Pos87262266	0.09
Genotype	BovChr3Pos89365301	0.09
Genotype	BovChr5Pos115916818	0.09
Genotype	BovChr16Pos26388857	0.09
Genotype	BovChr1Pos141793240	0.1
Genotype	BovChr18Pos56124130	0.1
Genotype	BovChr5Pos116526173	0.11
Genotype	BovChr8Pos36002556	0.11
Genotype	BovChr5Pos88182902	0.11
Genotype	BovChr28Pos24217547	0.12
Genotype	BovChr3Pos92418182	0.12
Genotype	BovChr5Pos118053957	0.13
Genotype	BovChr5Pos87473596	0.14
Genotype	BovChr17Pos46524672	0.16
Genotype	BovChr8Pos71492939	0.16
Genotype	BovChr3Pos92302468	0.18
Genotype	BovChr3Pos93668143	0.18
Genotype	BovChr3Pos93849644	0.18
Genotype	BovChr3Pos93976377	0.18
Genotype	BovChr3Pos88912286	0.18
Genotype	BovChr11Pos46350640	0.22
lncRNA	TCONS_00012161	-0.19
lncRNA	TCONS_00019463	-0.19
lncRNA	TCONS_00036413	-0.19
lncRNA	TCONS_00040516	-0.19
lncRNA	TCONS_00044868	-0.19
lncRNA	TCONS_00045857	-0.19
lncRNA	TCONS_00047365	-0.19
lncRNA	TCONS_00061238	-0.19
lncRNA	TCONS_00081264	-0.19
lncRNA	TCONS_00056310	-0.19
lncRNA	TCONS_00025071	-0.19
lncRNA	TCONS_00036937	-0.19
lncRNA	TCONS_00075774	-0.19
lncRNA	TCONS_00000689	-0.19
lncRNA	TCONS_00000768	-0.19
lncRNA	TCONS_00057677	-0.19
lncRNA	TCONS_00081481	-0.19
lncRNA	TCONS_00083411	-0.19
lncRNA	TCONS_00073640	-0.19
lncRNA	TCONS_00080528	-0.19
lncRNA	TCONS_00056733	-0.19
lncRNA	TCONS_00000507	-0.19
lncRNA	TCONS_00067307	-0.19
lncRNA	TCONS_00017888	-0.18
lncRNA	TCONS_00039272	-0.18
lncRNA	TCONS_00005559	-0.16
lncRNA	TCONS_00010621	-0.14
lncRNA	TCONS_00031928	-0.13
lncRNA	TCONS_00010967	-0.12
lncRNA	TCONS_00006756	-0.12
lncRNA	TCONS_00013804	-0.11
lncRNA	TCONS_00010622	-0.1
lncRNA	TCONS_00013503	-0.09
lncRNA	TCONS_00040867	-0.07
lncRNA	TCONS_00075364	0.05
mRNA	ENSBTAT00000059110	-0.23
mRNA	ENSBTAT00000059490	-0.22
mRNA	ENSBTAT00000080022	-0.22
mRNA	ENSBTAT00000043104	-0.22
mRNA	ENSBTAT00000065561	-0.22
mRNA	ENSBTAT00000020875	-0.22
mRNA	ENSBTAT00000010501	-0.22
mRNA	ENSBTAT00000059469	-0.22
mRNA	ENSBTAT00000060362	-0.22
mRNA	ENSBTAT00000081128	-0.22
mRNA	ENSBTAT00000031506	-0.22
mRNA	ENSBTAT00000069833	-0.22
mRNA	ENSBTAT00000073545	-0.19
mRNA	ENSBTAT00000078095	-0.19
mRNA	ENSBTAT00000086145	0.05
mRNA	ENSBTAT00000084234	0.05
mRNA	ENSBTAT00000047589	0.06
mRNA	ENSBTAT00000081763	0.06
mRNA	ENSBTAT00000075931	0.06
mRNA	ENSBTAT00000006929	0.06
mRNA	ENSBTAT00000031134	0.06
mRNA	ENSBTAT00000084648	0.06
mRNA	ENSBTAT00000054358	0.06
mRNA	ENSBTAT00000056121	0.06
mRNA	ENSBTAT00000009800	0.06
mRNA	ENSBTAT00000078697	0.06
mRNA	ENSBTAT00000072692	0.07
mRNA	ENSBTAT00000018054	0.07
mRNA	ENSBTAT00000072365	0.07
mRNA	ENSBTAT00000036603	0.08
mRNA	ENSBTAT00000079086	0.09
mRNA	ENSBTAT00000009559	0.09
mRNA	ENSBTAT00000026215	0.09
mRNA	ENSBTAT00000084624	0.09
mRNA	ENSBTAT00000009415	0.09
mRNA	ENSBTAT00000040146	0.09
mRNA	ENSBTAT00000040084	0.09
mRNA	ENSBTAT00000067039	0.09
mRNA	ENSBTAT00000067324	0.1
mRNA	ENSBTAT00000079639	0.1
mRNA	ENSBTAT00000072340	0.1
mRNA	ENSBTAT00000083420	0.1
mRNA	ENSBTAT00000055332	0.1
mRNA	ENSBTAT00000085326	0.1
mRNA	ENSBTAT00000076269	0.1
mRNA	ENSBTAT00000080343	0.1
mRNA	ENSBTAT00000082005	0.1
mRNA	ENSBTAT00000037743	0.1
mRNA	ENSBTAT00000026308	0.1
mRNA	ENSBTAT00000013399	0.11
mRNA	ENSBTAT00000076334	0.11
mRNA	ENSBTAT00000081091	0.12
mRNA	ENSBTAT00000024880	0.12
mRNA	ENSBTAT00000006167	0.12
mRNA	ENSBTAT00000075123	0.12
mRNA	ENSBTAT00000005642	0.13
Y	Case	-0.71
Y	Control	0.71

## Sheet: S2
Block	Feature	Loading
Genotype	BovChr3Pos89365301	-0.23
Genotype	BovChr10Pos61837266	-0.19
Genotype	BovChr3Pos93668143	-0.19
Genotype	BovChr3Pos93849644	-0.19
Genotype	BovChr3Pos93976377	-0.19
Genotype	BovChr11Pos46350640	-0.18
Genotype	BovChr3Pos88991871	-0.17
Genotype	BovChr3Pos92302468	-0.17
Genotype	BovChr3Pos88912286	-0.16
Genotype	BovChr17Pos46524672	-0.14
Genotype	BovChr8Pos71492939	-0.13
Genotype	BovChr5Pos87262266	-0.12
Genotype	BovChr1Pos141793240	-0.12
Genotype	BovChr3Pos92418182	-0.11
Genotype	BovChr8Pos36002556	-0.11
Genotype	BovChr5Pos87473596	-0.11
Genotype	BovChr5Pos118053957	-0.1
Genotype	BovChr5Pos88182902	-0.09
Genotype	BovChr28Pos24217547	-0.09
Genotype	BovChr1Pos141365527	-0.09
Genotype	BovChr5Pos116526173	-0.08
Genotype	BovChr3Pos96202292	-0.08
Genotype	BovChr4Pos87598662	-0.08
Genotype	BovChr18Pos57682137	-0.08
Genotype	BovChr3Pos87056414	-0.08
Genotype	BovChr16Pos26388857	-0.08
Genotype	BovChr18Pos56124130	-0.08
Genotype	BovChr5Pos115916818	-0.07
Genotype	BovChr28Pos27459868	-0.07
Genotype	BovChr3Pos89181812	-0.06
Genotype	BovChr18Pos61330975	-0.06
Genotype	BovChr8Pos87245919	-0.06
Genotype	BovChr17Pos46005257	-0.06
Genotype	BovChr5Pos89051206	-0.05
Genotype	BovChr25Pos1825647	-0.04
Genotype	BovChr3Pos88821997	-0.04
Genotype	BovChr3Pos30167683	-0.04
Genotype	BovChr8Pos35438545	-0.04
Genotype	BovChr15Pos5234380	-0.04
Genotype	BovChr8Pos60881902	-0.04
Genotype	BovChr28Pos26892434	-0.04
Genotype	BovChr23Pos43909068	-0.03
Genotype	BovChr28Pos27400738	-0.03
Genotype	BovChr15Pos9454207	-0.02
Genotype	BovChr1Pos146497300	-0.02
Genotype	BovChr23Pos44070630	-0.02
Genotype	BovChr10Pos81223782	-0.01
Genotype	BovChr28Pos42578721	-0.01
Genotype	BovChr28Pos30633568	0
Genotype	BovChr18Pos32192982	0
Genotype	BovChr28Pos27160954	0
Genotype	BovChr4Pos52315044	0.01
Genotype	BovChr10Pos81113154	0.01
Genotype	BovChr27Pos23369775	0.01
Genotype	BovChr5Pos88079689	0.02
Genotype	BovChr15Pos7037828	0.02
Genotype	BovChr27Pos38172660	0.02
Genotype	BovChr14Pos78522424	0.02
Genotype	BovChr18Pos32277796	0.03
Genotype	BovChr18Pos57151314	0.03
Genotype	BovChr10Pos81229490	0.03
Genotype	BovChr8Pos36246265	0.03
Genotype	BovChr15Pos5127591	0.03
Genotype	BovChr18Pos58716448	0.03
Genotype	BovChr17Pos49107623	0.04
Genotype	BovChr5Pos87846351	0.04
Genotype	BovChr17Pos58946521	0.04
Genotype	BovChr10Pos62442084	0.06
Genotype	BovChr5Pos88647267	0.06
Genotype	BovChr1Pos147241898	0.06
Genotype	BovChr8Pos37458257	0.06
Genotype	BovChr19Pos41594056	0.06
Genotype	BovChr27Pos35710124	0.06
Genotype	BovChr5Pos87192767	0.06
Genotype	BovChr1Pos59924376	0.07
Genotype	BovChr1Pos147338727	0.07
Genotype	BovChr10Pos61137869	0.08
Genotype	BovChr21Pos23567453	0.08
Genotype	BovChr21Pos23723788	0.08
Genotype	BovChr5Pos71548472	0.08
Genotype	BovChr14Pos78508738	0.08
Genotype	BovChr1Pos147295445	0.08
Genotype	BovChr10Pos65055281	0.08
Genotype	BovChr1Pos49415050	0.09
Genotype	BovChr5Pos41084896	0.09
Genotype	BovChr5Pos87901217	0.09
Genotype	BovChr1Pos140713996	0.1
Genotype	BovChr17Pos46078006	0.1
Genotype	BovChr10Pos61162083	0.11
Genotype	BovChr10Pos65020001	0.11
Genotype	BovChr3Pos34903364	0.11
Genotype	BovChr14Pos78489957	0.11
Genotype	BovChr3Pos92431268	0.11
Genotype	BovChr1Pos45105866	0.12
Genotype	BovChr14Pos80813248	0.12
Genotype	BovChr18Pos33388109	0.13
Genotype	BovChr1Pos152960777	0.15
Genotype	BovChr10Pos49448554	0.15
Genotype	BovChr3Pos89098449	0.16
Genotype	BovChr3Pos88966274	0.16
Genotype	BovChr3Pos87458490	0.17
Genotype	BovChr3Pos91549234	0.17
Genotype	BovChr3Pos92637901	0.18
Genotype	BovChr5Pos38483708	0.21
lncRNA	TCONS_00044187	-0.1
lncRNA	TCONS_00002626	-0.1
lncRNA	TCONS_00041300	-0.07
lncRNA	TCONS_00053831	-0.05
lncRNA	TCONS_00075162	-0.05
lncRNA	TCONS_00111824	-0.05
lncRNA	TCONS_00136216	-0.05
lncRNA	TCONS_00012359	-0.04
lncRNA	TCONS_00138856	-0.03
lncRNA	TCONS_00097540	-0.02
lncRNA	TCONS_00043403	-0.01
lncRNA	TCONS_00039374	0
lncRNA	TCONS_00020772	0
lncRNA	TCONS_00109742	0.01
lncRNA	TCONS_00039443	0.01
lncRNA	TCONS_00126680	0.01
lncRNA	TCONS_00025659	0.01
lncRNA	TCONS_00104303	0.02
lncRNA	TCONS_00019768	0.02
lncRNA	TCONS_00128548	0.02
lncRNA	TCONS_00144472	0.03
lncRNA	TCONS_00110966	0.03
lncRNA	TCONS_00004861	0.03
lncRNA	TCONS_00068414	0.04
lncRNA	TCONS_00071609	0.05
lncRNA	TCONS_00114682	0.1
lncRNA	TCONS_00135417	0.15
lncRNA	TCONS_00114690	0.15
lncRNA	TCONS_00001123	0.25
lncRNA	TCONS_00011287	0.27
lncRNA	TCONS_00041949	0.33
lncRNA	TCONS_00034754	0.33
lncRNA	TCONS_00018769	0.33
lncRNA	TCONS_00105960	0.33
lncRNA	TCONS_00071994	0.33
lncRNA	TCONS_00089040	0.33
lncRNA	TCONS_00089054	0.33
mRNA	ENSBTAT00000080303	-0.05
mRNA	ENSBTAT00000062558	-0.05
mRNA	ENSBTAT00000057212	-0.05
mRNA	ENSBTAT00000060573	-0.05
mRNA	ENSBTAT00000060752	0
mRNA	ENSBTAT00000059403	0.19
mRNA	ENSBTAT00000076154	0.22
mRNA	ENSBTAT00000082189	0.24
mRNA	ENSBTAT00000025774	0.24
mRNA	ENSBTAT00000035434	0.25
mRNA	ENSBTAT00000003804	0.25
mRNA	ENSBTAT00000087300	0.25
mRNA	ENSBTAT00000064111	0.25
mRNA	ENSBTAT00000085213	0.25
mRNA	ENSBTAT00000080742	0.25
mRNA	ENSBTAT00000069144	0.25
mRNA	ENSBTAT00000077014	0.25
mRNA	ENSBTAT00000053675	0.25
mRNA	ENSBTAT00000025695	0.25
mRNA	ENSBTAT00000083411	0.25
mRNA	ENSBTAT00000014850	0.25
mRNA	ENSBTAT00000053470	0.25
Y	Control	-0.71
Y	Case	0.71

## Sheet: S3
feature	Vertex	Community
ENSBTAT00000040084	ENSBTAT00000040084_mRNA	1
ENSBTAT00000067039	ENSBTAT00000067039_mRNA	1
ENSBTAT00000026215	ENSBTAT00000026215_mRNA	1
ENSBTAT00000084624	ENSBTAT00000084624_mRNA	1
ENSBTAT00000005642	ENSBTAT00000005642_mRNA	1
ENSBTAT00000081091	ENSBTAT00000081091_mRNA	1
ENSBTAT00000024880	ENSBTAT00000024880_mRNA	1
ENSBTAT00000009415	ENSBTAT00000009415_mRNA	1
ENSBTAT00000040146	ENSBTAT00000040146_mRNA	1
ENSBTAT00000036603	ENSBTAT00000036603_mRNA	1
ENSBTAT00000026308	ENSBTAT00000026308_mRNA	1
TCONS_00006756	TCONS_00006756_lncRNA	1
TCONS_00010622	TCONS_00010622_lncRNA	1
TCONS_00013804	TCONS_00013804_lncRNA	1
BovChr3Pos88912286	BovChr3Pos88912286_Genotype	1
BovChr11Pos46350640	BovChr11Pos46350640_Genotype	1
ENSBTAT00000073545	ENSBTAT00000073545_mRNA	2
ENSBTAT00000078095	ENSBTAT00000078095_mRNA	2
TCONS_00017888	TCONS_00017888_lncRNA	2
TCONS_00012161	TCONS_00012161_lncRNA	2
TCONS_00010621	TCONS_00010621_lncRNA	2
BovChr3Pos88966274	BovChr3Pos88966274_Genotype	2
BovChr3Pos93668143	BovChr3Pos93668143_Genotype	2
BovChr3Pos93849644	BovChr3Pos93849644_Genotype	2
BovChr3Pos93976377	BovChr3Pos93976377_Genotype	2
ENSBTAT00000069833	ENSBTAT00000069833_mRNA	3
ENSBTAT00000059110	ENSBTAT00000059110_mRNA	3
ENSBTAT00000059490	ENSBTAT00000059490_mRNA	3
ENSBTAT00000080022	ENSBTAT00000080022_mRNA	3
ENSBTAT00000043104	ENSBTAT00000043104_mRNA	3
ENSBTAT00000065561	ENSBTAT00000065561_mRNA	3
ENSBTAT00000020875	ENSBTAT00000020875_mRNA	3
ENSBTAT00000010501	ENSBTAT00000010501_mRNA	3
ENSBTAT00000059469	ENSBTAT00000059469_mRNA	3
ENSBTAT00000060362	ENSBTAT00000060362_mRNA	3
ENSBTAT00000081128	ENSBTAT00000081128_mRNA	3
ENSBTAT00000031506	ENSBTAT00000031506_mRNA	3
TCONS_00000507	TCONS_00000507_lncRNA	3
TCONS_00005559	TCONS_00005559_lncRNA	3
TCONS_00019463	TCONS_00019463_lncRNA	3
TCONS_00036413	TCONS_00036413_lncRNA	3
TCONS_00039272	TCONS_00039272_lncRNA	3
TCONS_00040516	TCONS_00040516_lncRNA	3
TCONS_00044868	TCONS_00044868_lncRNA	3
TCONS_00045857	TCONS_00045857_lncRNA	3
TCONS_00047365	TCONS_00047365_lncRNA	3
TCONS_00056733	TCONS_00056733_lncRNA	3
TCONS_00061238	TCONS_00061238_lncRNA	3
TCONS_00067307	TCONS_00067307_lncRNA	3
TCONS_00080528	TCONS_00080528_lncRNA	3
TCONS_00081264	TCONS_00081264_lncRNA	3
TCONS_00056310	TCONS_00056310_lncRNA	3
TCONS_00025071	TCONS_00025071_lncRNA	3
TCONS_00036937	TCONS_00036937_lncRNA	3
TCONS_00075774	TCONS_00075774_lncRNA	3
TCONS_00000689	TCONS_00000689_lncRNA	3
TCONS_00000768	TCONS_00000768_lncRNA	3
TCONS_00057677	TCONS_00057677_lncRNA	3
TCONS_00081481	TCONS_00081481_lncRNA	3
TCONS_00083411	TCONS_00083411_lncRNA	3
TCONS_00073640	TCONS_00073640_lncRNA	3
BovChr1Pos141793240	BovChr1Pos141793240_Genotype	3

## Sheet: S4
feature	Vertex	Community
ENSBTAT00000080303	ENSBTAT00000080303_mRNA	1
TCONS_00144472	TCONS_00144472_lncRNA	1
TCONS_00104303	TCONS_00104303_lncRNA	1
TCONS_00126680	TCONS_00126680_lncRNA	1
TCONS_00039443	TCONS_00039443_lncRNA	1
TCONS_00019768	TCONS_00019768_lncRNA	1
TCONS_00110966	TCONS_00110966_lncRNA	1
TCONS_00135417	TCONS_00135417_lncRNA	1
TCONS_00071609	TCONS_00071609_lncRNA	1
TCONS_00068414	TCONS_00068414_lncRNA	1
TCONS_00111824	TCONS_00111824_lncRNA	1
TCONS_00004861	TCONS_00004861_lncRNA	1
TCONS_00128548	TCONS_00128548_lncRNA	1
TCONS_00114682	TCONS_00114682_lncRNA	1
TCONS_00114690	TCONS_00114690_lncRNA	1
BovChr5Pos89051206	BovChr5Pos89051206_Genotype	1
BovChr10Pos49448554	BovChr10Pos49448554_Genotype	1
BovChr10Pos62442084	BovChr10Pos62442084_Genotype	1
BovChr8Pos87245919	BovChr8Pos87245919_Genotype	1
ENSBTAT00000014850	ENSBTAT00000014850_mRNA	2
ENSBTAT00000025695	ENSBTAT00000025695_mRNA	2
ENSBTAT00000083411	ENSBTAT00000083411_mRNA	2
TCONS_00034754	TCONS_00034754_lncRNA	2
TCONS_00001123	TCONS_00001123_lncRNA	2
BovChr3Pos92637901	BovChr3Pos92637901_Genotype	2
BovChr3Pos93668143	BovChr3Pos93668143_Genotype	2
BovChr3Pos93849644	BovChr3Pos93849644_Genotype	2
BovChr3Pos93976377	BovChr3Pos93976377_Genotype	2
BovChr10Pos61837266	BovChr10Pos61837266_Genotype	2
ENSBTAT00000035434	ENSBTAT00000035434_mRNA	3
ENSBTAT00000076154	ENSBTAT00000076154_mRNA	3
ENSBTAT00000003804	ENSBTAT00000003804_mRNA	3
ENSBTAT00000087300	ENSBTAT00000087300_mRNA	3
ENSBTAT00000064111	ENSBTAT00000064111_mRNA	3
ENSBTAT00000085213	ENSBTAT00000085213_mRNA	3
ENSBTAT00000080742	ENSBTAT00000080742_mRNA	3
ENSBTAT00000069144	ENSBTAT00000069144_mRNA	3
ENSBTAT00000077014	ENSBTAT00000077014_mRNA	3
ENSBTAT00000053675	ENSBTAT00000053675_mRNA	3
ENSBTAT00000053470	ENSBTAT00000053470_mRNA	3
ENSBTAT00000082189	ENSBTAT00000082189_mRNA	3
ENSBTAT00000025774	ENSBTAT00000025774_mRNA	3
ENSBTAT00000059403	ENSBTAT00000059403_mRNA	3
TCONS_00011287	TCONS_00011287_lncRNA	3
TCONS_00018769	TCONS_00018769_lncRNA	3
TCONS_00105960	TCONS_00105960_lncRNA	3
TCONS_00071994	TCONS_00071994_lncRNA	3
TCONS_00089040	TCONS_00089040_lncRNA	3
TCONS_00089054	TCONS_00089054_lncRNA	3
TCONS_00041949	TCONS_00041949_lncRNA	3
BovChr3Pos88991871	BovChr3Pos88991871_Genotype	3
BovChr3Pos89365301	BovChr3Pos89365301_Genotype	3
BovChr11Pos46350640	BovChr11Pos46350640_Genotype	3
